# Supplementary material for: The protective effects of yellow tea extract against loperamide-induced constipation in mice
Source: Royal Society of Chemistry journal article supplement (doi:10.1039/d0fo02969f), 2021-01-01
Supplement: d0fo02969f1.xlsx [file d0fo02969f1.xlsx]

## Sheet: S1
Supplementary 1 The results of comparsion between the two groups at Phylum level before and after loperamide-induced
Phylum name	BNC-Mean(%)	BNC-Sd(%)	BYL-Mean(%)	BYL-Sd(%)	BYH-Mean(%)	BYH-Sd(%)	NC-Mean(%)	NC-Sd(%)	MI-Mean(%)	MI-Sd(%)	YL-Mean(%)	YL-Sd(%)	YLI-Mean(%)	YLI-Sd(%)	YHI-Mean(%)	YHI-Sd(%)	BNC vs BYL	BNC vs BYH	NC vs MI	NC vs YL	MI vs YLI	MI vs YHI
Bacteroidetes	41.17	14.44	71.25	13.26	63.54	13.2	48.99	17.16	73.18	9.883	55	6.668	72.44	13.11	53.86	16.39	↑
Firmicutes	52.67	13.02	23.3	12.21	30.66	12.17	44.66	15.97	21.55	7.959	39.99	4.996	21.78	12.38	39.26	16.49	↓		↓
Actinobacteria	0.02411	0.01242	0.2142	0.1895	0.2466	0.2337	0.1157	0.125	0.02824	0.0221	0.1102	0.141	0.5228	0.447	0.4931	0.5319	↑	↑			↑	↑
Patescibacteria	0.6288	0.4159	0.3816	0.2471	0.3705	0.1729	0.1247	0.08256	0.08609	0.08974	0.4993	0.3954	0.3154	0.3584	0.6102	0.555
Proteobacteria	1.559	0.3333	1.315	0.738	1.543	0.9438	2.097	0.6481	1.396	0.5409	1.004	0.3448	1.935	0.715	1.49	0.6594				↓
Verrucomicrobia	0.003444	0.005965	1.079	1.875	0.8086	1.608	0.09711	0.1607	1.251	1.794	0.03995	0.03379	0.6467	0.3885	1.721	1.492
Tenericutes	0.1846	0.08122	0.467	0.4622	0.08747	0.1228	0.01515	0.009921	0.1508	0.2061	0.09711	0.04939	0.03375	0.06065	0.08541	0.1195				↑
Epsilonbacteraeota	3.717	1.876	1.84	0.8349	2.508	2.129	3.755	0.9553	2.151	1.839	3.073	1.956	2.185	0.9518	2.207	1.259
Deferribacteres	0.02755	0.01773	0.01378	0.01481	0.03306	0.03309	0.06268	0.07464	0.06543	0.104	0.07301	0.1461	0.004821	0.00898	0.04959	0.09009
Cyanobacteria	0.01309	0.007466	0.1309	0.1572	0.197	0.2026	0.07507	0.09857	0.1254	0.08608	0.09298	0.09192	0.1329	0.09204	0.2128	0.09523		↑
Satistical significance were determined by Wilcoxon rank-sum test using R the stats of package;The arrows (↑) and (↓) represented more and less abundances of significantly differential phylum

## Sheet: S2
Supplementary 2 The results of comparsion between the two groups at Family level before and after loperamide-induced
Family name	BNC-Mean(%)	BNC-Sd(%)	BYL-Mean(%)	BYL-Sd(%)	BYH-Mean(%)	BYH-Sd(%)	NC-Mean(%)	NC-Sd(%)	MI-Mean(%)	MI-Sd(%)	YL-Mean(%)	YL-Sd(%)	YLI-Mean(%)	YLI-Sd(%)	YHI-Mean(%)	YHI-Sd(%)	BNC vs BYL	BNC vs BYH	NC vs MI	NC vs YL	MI vs YLI	MI vs YHI
Muribaculaceae	16.7	7.945	48.81	11.68	47.96	10.36	27.82	11.48	41.25	10.86	37.99	10.41	48.46	8.429	39.27	12.13	↑	↑
Lachnospiraceae	38.49	10.78	14.1	8.896	19.64	11.4	34.69	15.46	13.26	5.781	27.49	5.301	13.63	8.718	25.94	18.31	↓	↓	↓
Prevotellaceae	7.533	4.53	13.99	6.814	10.17	6.118	4.783	3.548	18.63	8.26	9.801	3.175	16.03	17.31	9.835	5.308			↑
Ruminococcaceae	11.75	3.039	6.831	4.408	9.121	3.327	7.188	2.471	5.447	2.567	10.25	2.057	5.467	3.669	9.254	2.714
Bacteroidaceae	10.62	9.964	5.059	2.939	3.29	1.624	10.62	6.488	9.884	4.832	4.184	5.221	5.701	3.485	2.951	2.229						↓
Helicobacteraceae	3.717	1.876	1.84	0.8349	2.508	2.129	3.755	0.9553	2.151	1.839	3.073	1.956	2.185	0.9518	2.207	1.259
Rikenellaceae	4.477	0.8397	1.358	0.5492	1.159	0.5051	4.27	1.344	1.226	0.5521	1.86	1.007	1.176	0.4513	0.7645	0.399	↓	↓	↓	↓
Lactobacillaceae	0.3451	0.1897	0.9395	0.3518	0.8189	0.2314	0.9484	1.252	1.18	0.3786	1.104	0.7796	1.548	0.7514	2.686	2.04	↑	↑
Desulfovibrionaceae	1.43	0.3434	0.7445	0.6085	1.152	0.9731	1.836	0.749	1.054	0.6264	0.8582	0.3821	1.108	0.7523	1.187	0.6349				↓
Tannerellaceae	1.326	1.007	1.278	0.8185	0.5262	0.1836	0.9546	0.4104	1.353	0.8494	0.7039	0.3955	0.509	0.2368	0.7315	0.342					↓
Clostridiales_vadinBB60_group	1.513	0.5227	0.6481	0.5936	0.3657	0.1254	1.258	0.8806	1.247	0.9913	0.4801	0.2593	0.3995	0.3187	0.3823	0.1423	↓	↓			↓	↓
Akkermansiaceae	0.003444	0.005965	1.079	1.875	0.8086	1.608	0.09711	0.1607	1.251	1.794	0.03995	0.03379	0.6467	0.3885	1.721	1.492
unclassified_o__Bacteroidales	0.4215	0.3176	0.6302	0.3963	0.2996	0.1161	0.4332	0.1877	0.7452	0.2701	0.3891	0.1628	0.4442	0.2348	0.219	0.1458						↓
Saccharimonadaceae	0.6288	0.4159	0.3816	0.2471	0.3705	0.1729	0.1247	0.08256	0.08609	0.08974	0.4993	0.3954	0.3154	0.3584	0.6102	0.555
Burkholderiaceae	0.1081	0.09354	0.5324	0.5185	0.312	0.2161	0.2514	0.2489	0.2066	0.1585	0.1267	0.08384	0.6123	0.3162	0.2087	0.153	↑
Erysipelotrichaceae	0.0978	0.07953	0.2679	0.3131	0.343	0.215	0.1412	0.07868	0.07783	0.06125	0.1522	0.08747	0.3168	0.283	0.4677	0.3947					↑	↑
Peptococcaceae	0.3595	0.1781	0.1419	0.09283	0.1591	0.07813	0.2438	0.06449	0.1956	0.1411	0.2204	0.05854	0.1598	0.09113	0.1984	0.1415	↓	↓
Bifidobacteriaceae	0.001378	0.001886	0.1378	0.1672	0.1501	0.1628	0.06474	0.09529	0.006888	0.00974	0.07301	0.1443	0.3664	0.3195	0.3637	0.4248	↑	↑			↑
Family_XIII	0.07783	0.01816	0.1123	0.06154	0.1274	0.03554	0.1619	0.1039	0.07439	0.01453	0.1254	0.06096	0.1185	0.04982	0.2052	0.07908			↓			↑
norank_o__Gastranaerophilales	0.008954	0.008644	0.1281	0.1591	0.1963	0.2029	0.07439	0.0973	0.1198	0.09096	0.08954	0.08864	0.1329	0.09204	0.2128	0.09523		↑
norank_o__Mollicutes_RF39	0.1667	0.08809	0.1646	0.1589	0.03513	0.01365	0.01515	0.009921	0.04821	0.0469	0.09711	0.04939	0.03306	0.05913	0.06956	0.1256		↓		↑
Marinifilaceae	0.07094	0.03901	0.1012	0.03086	0.07852	0.03169	0.08334	0.04185	0.05992	0.0344	0.06061	0.02186	0.07025	0.009305	0.05166	0.01773
norank_o__Rhodospirillales	0.01102	0.01746	0.03582	0.02968	0.07301	0.04687	0.002066	0.00308	0.1336	0.1973	0.01446	0.01641	0.2108	0.1589	0.08816	0.02406		↑	↑
Clostridiaceae_1	0.01584	0.01957	0.07439	0.08438	0.01309	0.01712	0.002755	0.00449	0.03926	0.04782	0.1219	0.2088	0.05166	0.1079	0.01929	0.02629
Deferribacteraceae	0.02755	0.01773	0.01378	0.01481	0.03306	0.03309	0.06268	0.07464	0.06543	0.104	0.07301	0.1461	0.004821	0.00898	0.04959	0.09009
Atopobiaceae	0.000689	0.00154	0.04752	0.06622	0.0551	0.08372	0.02204	0.03208	0.006888	0.01356	0.0124	0.01412	0.1012	0.1366	0.06268	0.08496	↑	↑			↑	↑
Christensenellaceae	0.008954	0.009305	0.03582	0.03124	0.05786	0.02353	0.0186	0.009921	0.02617	0.01942	0.02548	0.022	0.02135	0.008575	0.07783	0.05688		↑
Flavobacteriaceae	0.03099	0.03949	0.02273	0.0105	0.05579	0.05491	0.03237	0.01302	0.03237	0.01972	0.01309	0.01449	0.04477	0.04197	0.03926	0.05588				↓
Eggerthellaceae	0.02135	0.01203	0.02755	0.01089	0.03926	0.01927	0.02824	0.01908	0.01378	0.006443	0.02342	0.01298	0.05235	0.0221	0.06405	0.03096					↑	↑
Nitrosomonadaceae	0.004133	0.003772	0.001378	0.00308	0.004133	0.00449	0.006199	0.005108	0.000689	0.00154	0.002066	0.001886	0.002066	0.00308	0.000689	0.00154
unclassified_o__Clostridiales	0.002755	0.002881	0.002755	0.002881	0.003444	0.004218	0.000689	0.00154	0.001378	0.00308	0.002755	0.00154	0.002066	0.00308	0.002755	0.00616
Satistical significance were determined by Wilcoxon rank-sum test using R the stats of package;The arrows (↑) and (↓) represented more and less abundances of significantly differential family
